# Supplementary material for: Predictors of Adherence to Prescribed Exercise Programs for Older Adults With Medical or Surgical Indications for Exercise: a Systematic Review
Source: Research Square preprint supplement (doi:10.21203/rs.3.rs-130918/v1), 2020-12-21
Supplement: Supplementary file 1 [file 46ad8bd131c20b226c1e5092.docx]

**Supplementary Table S7. Risk of Bias Assessments for Randomized Controlled Trials (Cochrane Risk of Bias tool)**

| Author (Year) | Random sequence generation | Allocation concealment | Blinding of participants and personnel | Blinding of outcome assessment | Incomplete outcome data | Selective reporting | Other bias |
| --- | --- | --- | --- | --- | --- | --- | --- |
| Covey et al. (2014) |  | * |  |  |  |  |  |
| Karssemeijer et al. (2019) | * | * |  |  |  |  |  |
| Pandey et al. (2017) | * | * |  | * |  |  |  |
| Rizk et al. (2015) | * | * |  | * |  |  |  |
|  |  |  |  |  |  |  |  |
|  | Low |  | Moderate |  |  | High | * Unclear |
